# Supplementary material for: Single-time-point dosimetry using model selection and nonlinear mixed-effects modelling: a proof of concept
Source: Springer Nature journal article supplement (doi:10.1186/s40658-023-00530-1), 2023-02-10
Supplement: MOESM1 [file 40658_2023_530_MOESM1_ESM.pdf]

# Supplemental File

## Single-Time-Point Dosimetry Using Model Selection and Non-Linear Mixed-Effects Modelling: A Proof of Concept

Deni Hardiansyah<sup>1,2</sup>, Ade Riana<sup>1</sup>, Ambros J. Beer<sup>3</sup>, Gerhard Glatting<sup>3,4</sup>

<sup>1</sup>Medical Physics and Biophysics, Physics Department, Faculty of Mathematics and Natural Sciences, Universitas Indonesia, Depok, Indonesia

<sup>2</sup>Research Collaboration Center for Theranostic Radiopharmaceuticals, Bandung, Indonesia

<sup>3</sup>Department of Nuclear Medicine, Ulm University, Ulm, Germany

<sup>4</sup>Medical Radiation Physics, Department of Nuclear Medicine, Ulm University, Ulm, Germany

**Fig. S1**

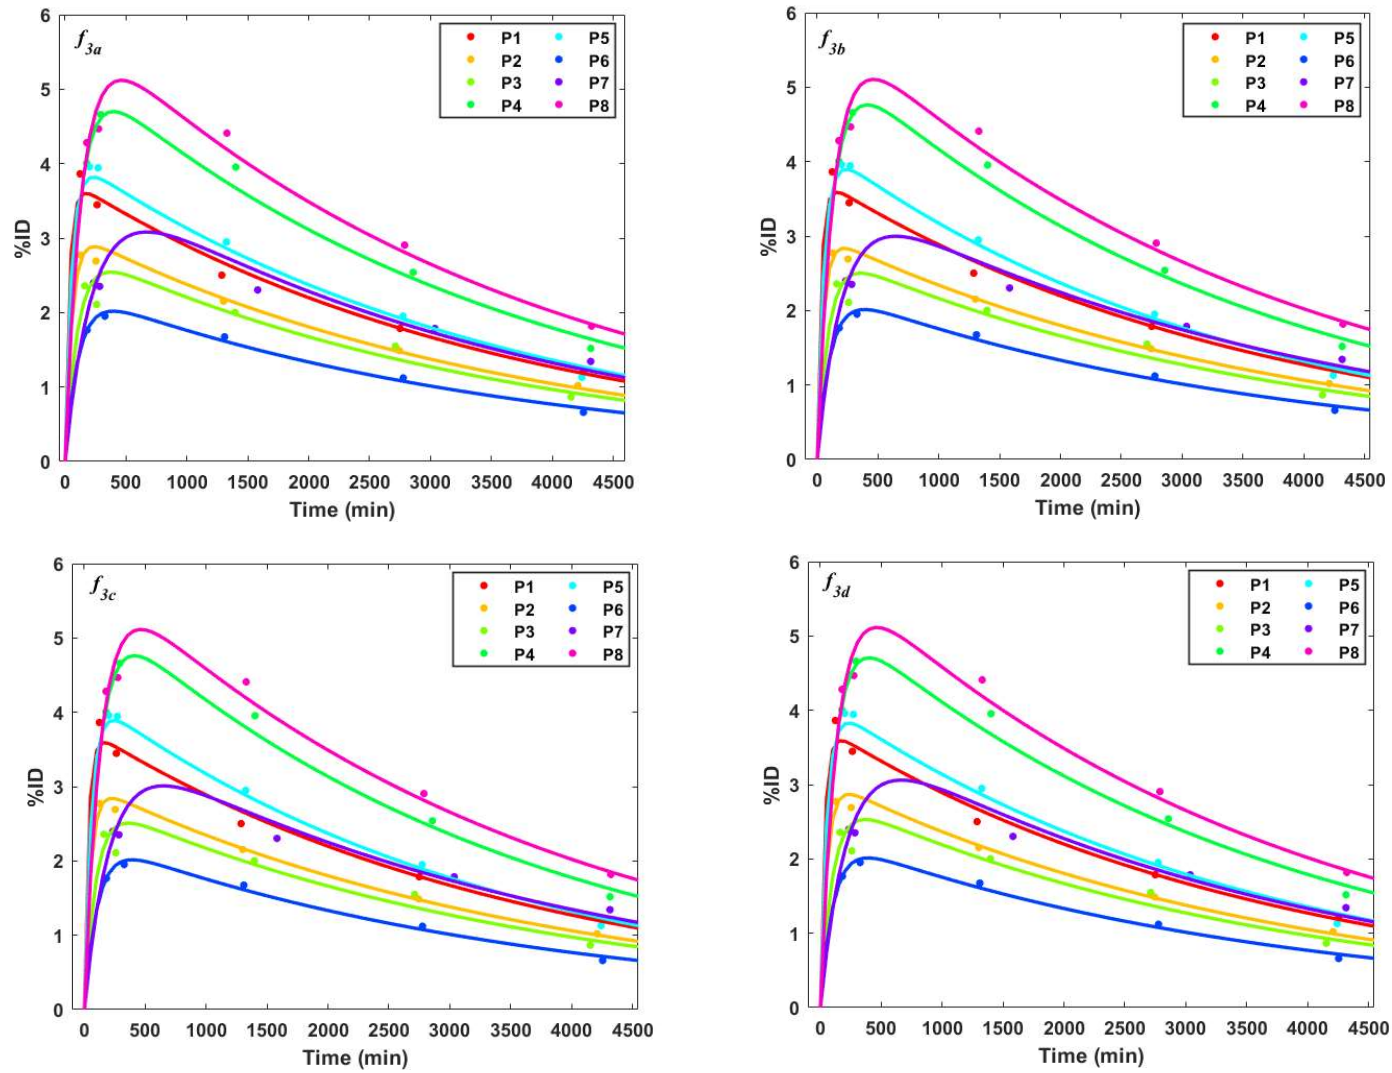

**Fig. S1.** Time-activity data and all-time-points (ATP) fit curves obtained using functions  $f_{3a}$ ,  $f_{3b}$ ,  $f_{3c}$ , and  $f_{3d}$ .

**Fig. S2**

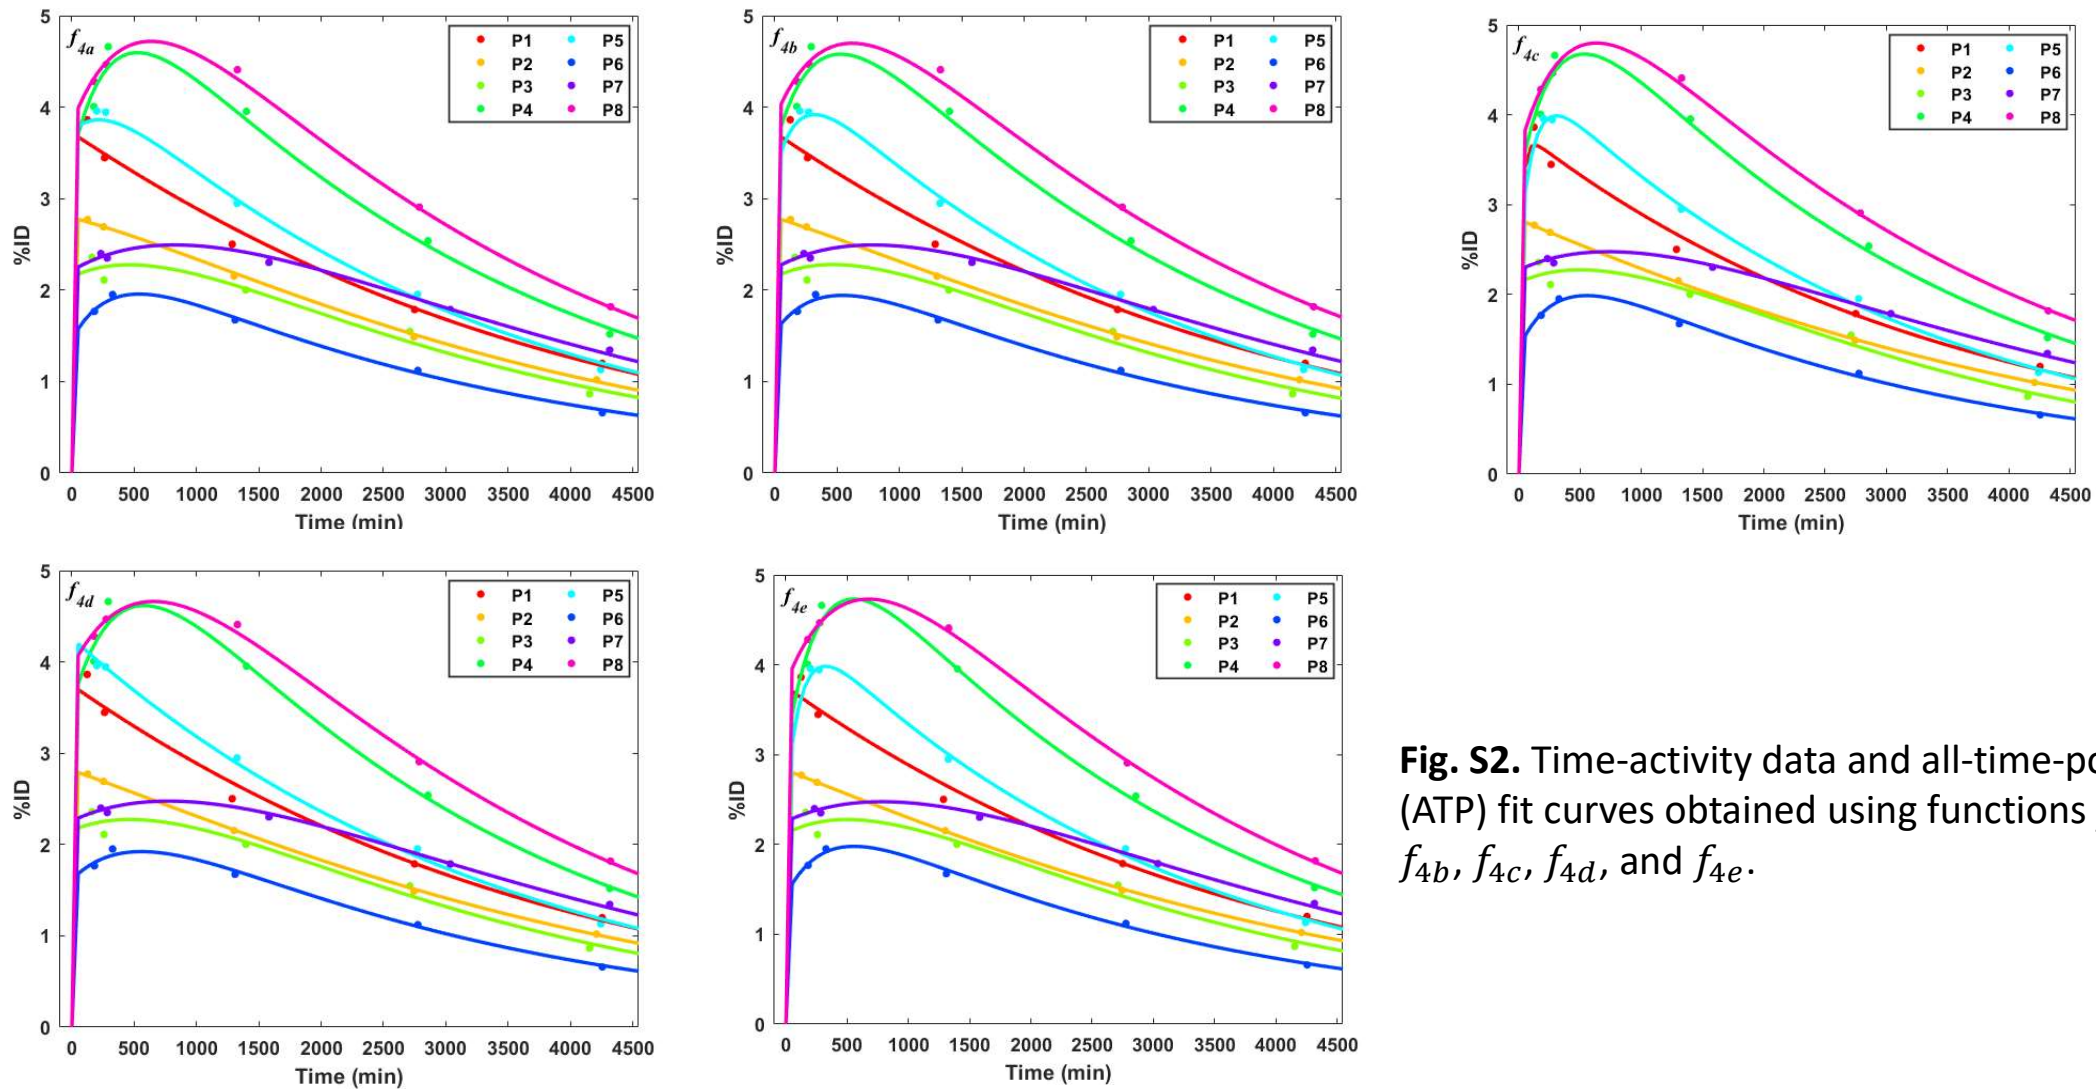

**Fig. S2.** Time-activity data and all-time-points (ATP) fit curves obtained using functions  $f_{4a}$ ,  $f_{4b}$ ,  $f_{4c}$ ,  $f_{4d}$ , and  $f_{4e}$ .

**Fig. S3**

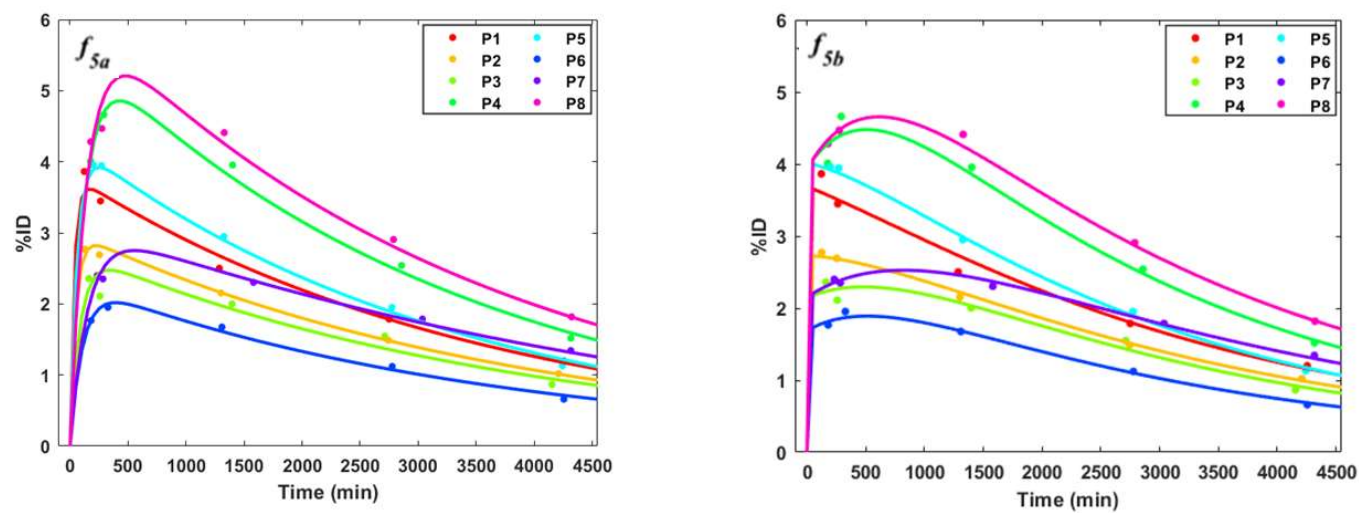

**Fig. S3.** Time-activity data and all-time-points (ATP) fit curves obtained using functions  $f_{5a}$ , and  $f_{5b}$ .

**Tab. S1.** RDs and RMSEs of TIAs obtained using a single time point fitting, and the best function of MS-NLME ( $f_{4d}$ ) and the 3-parameter function  $f_{3d}$  with the second-highest Akaike weight (Table 1) of the 3-parameter functions (also used in ref. [8]). The RMSE of the STP method with the MS-NLME best function has a better performance than the RMSE of the STP method with function  $f_{3d}$  by a factor of two, which shows the superiority of the MS-NLME approach over the non-model-selecting NLME approach.

| STP Methods       | Timepoint (h) | RD (%)    |                   | RMSE of the %RD (%) |
|-------------------|---------------|-----------|-------------------|---------------------|
|                   |               | mean (SD) | median [min, max] |                     |
| Function $f_{4d}$ | T3 (22.8±1.6) | 0 (8)     | -1 [-13, 10]      | 7.8                 |
| Function $f_{3d}$ |               | -6 (9)    | -9 [-21, 5]       | 10.9                |
| Function $f_{4d}$ | T4 (46.7±1.7) | 0 (5)     | 1 [-7, 9]         | 4.9                 |
| Function $f_{3d}$ |               | -9 (6)    | -8 [-19, -1]      | 10.7                |

RD ... Relative deviation; RMSE ... root mean square error; TIA ... Time-integrated activity; MS ... Model selection; NLME ... Non-linear mixed-effects modelling; STP ... single-time-point
